# Supplementary material
Source: PubMed Central journal article supplement (PMC2863112)
Supplement: NIHMS186301-supplement-01.pdf [file NIHMS186301-supplement-01.pdf]

## SUPPLEMENTARY MATERIAL

### Supplementary Figure 1

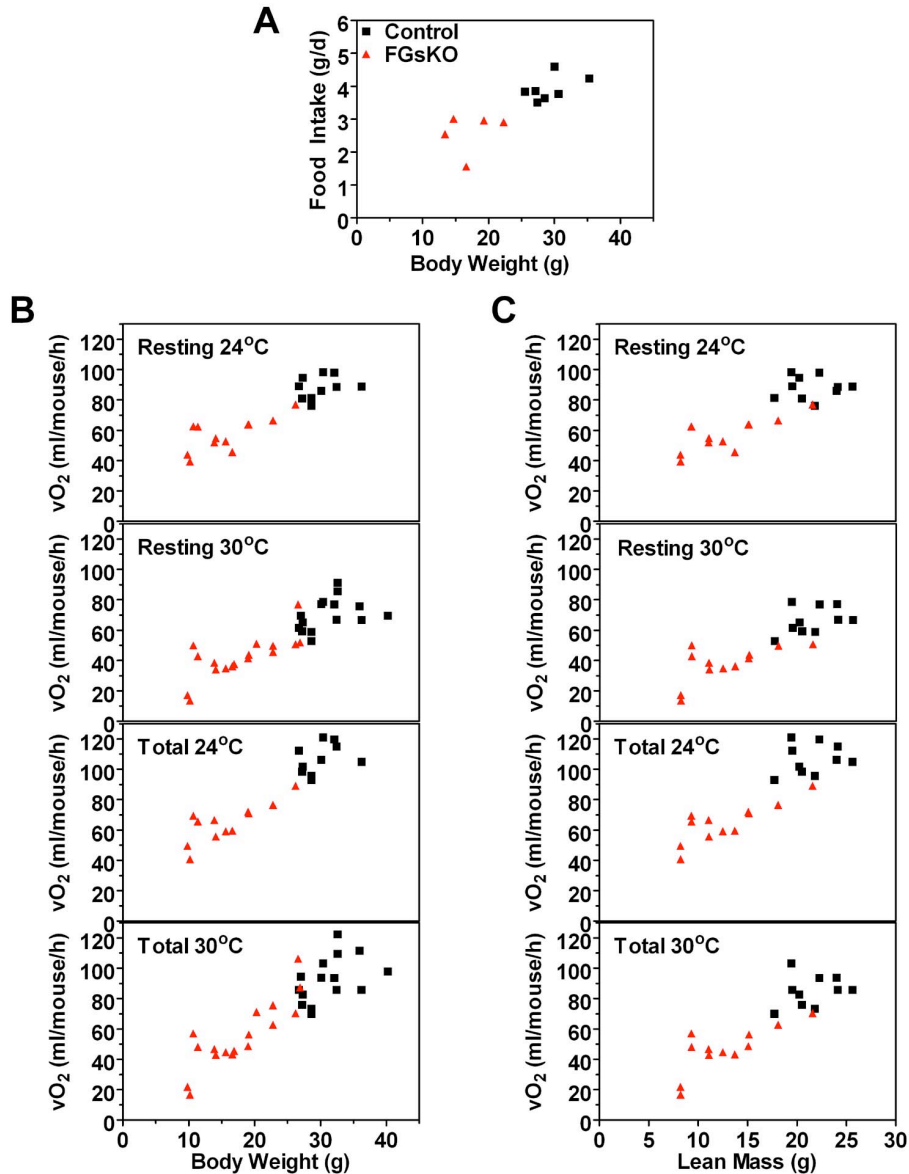

**Figure S1. Food Intake and Energy Expenditure vs Body Weight or Lean Mass.**

(A) Plot of individual measures of body weight vs. daily food intake (g/d) in male control (black) and FGsKO mice (red).

(B-C) Plots of individual measures of (B) body weight or (C) lean mass vs. resting or total energy expenditure ( $vO_2$  in ml/mouse/h) at either 24°C or 30°C.
